# Supplementary material for: An Efficient Algorithm for Sensitively Detecting Circular RNA from RNA-seq Data
Source: MDPI journal article supplement (doi:10.3390/ijms19102897), 2018-09-24
Supplement: s1 [file s1]

Supplementary Table S1.

| Tool      | <i>De novo</i> | Mapper  | Dependencies            | Language  | Version |
|-----------|----------------|---------|-------------------------|-----------|---------|
| CIRCplus  | Yes            | BWA-MEM | None                    | Perl Java | N/A     |
| CIRI      | Yes            | BWA-MEM | None                    | Perl      | 1.0.2   |
| CIRI2     | Yes            | BWA-MEM | None                    | Perl      | 2.0.3   |
| find_circ | Yes            | Bowtie2 | Pysam samtools Bedtools | Python    | 1.2     |
