# Supplementary material for: An Efficient Algorithm for Sensitively Detecting Circular RNA from RNA-seq Data
Source: MDPI journal article supplement (doi:10.3390/ijms19102897), 2018-09-24
Supplement: s1 [file s1]

Supplementary Table S2.

| read_length | linear_transcript_<br>coverage | BWA-MEM '-T' | Supplementary Table S2. |           |           |             |           |           |             |           |           |             |           |           |
|-------------|--------------------------------|--------------|-------------------------|-----------|-----------|-------------|-----------|-----------|-------------|-----------|-----------|-------------|-----------|-----------|
|             |                                |              | find_circ               |           |           | CIRI        |           |           | CIRI2       |           |           | CIRCplus    |           |           |
|             |                                |              | sensitivity             | precision | F1-score  | sensitivity | precision | F1-score  | sensitivity | precision | F1-score  | sensitivity | precision | F1-score  |
| 40          | 10                             | default      | 0.11                    | 0.99      | 0.198     | 0           | 0         | 0         | 0           | 0         | 0         | 0.4         | 0.77      | 0.5264957 |
|             |                                | -T19         |                         |           |           | 0.36        | 0.89      | 0.5089809 | 0.33        | 0.98      | 0.4937405 | 0.58        | 0.83      | 0.6828369 |
|             | 30                             | default      | 0.12                    | 0.99      | 0.2140541 | 0           | 0         | 0         | 0           | 0         | 0         | 0.4         | 0.52      | 0.4521739 |
|             |                                | -T19         |                         |           |           | 0.35        | 0.89      | 0.5068391 | 0.32        | 0.98      | 0.4824615 | 0.55        | 0.53      | 0.5398148 |
|             | 50                             | default      | 0.11                    | 0.98      | 0.1977982 | 0           | 0         | 0         | 0           | 0         | 0         | 0.37        | 0.50      | 0.4252874 |
|             |                                | -T19         |                         |           |           | 0.31        | 0.76      | 0.4422517 | 0.28        | 0.98      | 0.4355556 | 0.56        | 0.42      | 0.48      |
|             | 70                             | default      | 0.13                    | 0.99      | 0.2298214 | 0           | 0         | 0         | 0           | 0         | 0         | 0.42        | 0.37      | 0.3934177 |
|             |                                | -T19         |                         |           |           | 0.3         | 0.78      | 0.4333333 | 0.29        | 0.98      | 0.4475591 | 0.58        | 0.47      | 0.5192381 |
| 50          | 10                             | default      | 0.34                    | 0.99      | 0.5061654 | 0           | 0         | 0         | 0           | 0         | 0         | 0.60        | 0.90      | 0.72      |
|             |                                | -T19         |                         |           |           | 0.52        | 0.93      | 0.6657122 | 0.49        | 0.98      | 0.6533333 | 0.65        | 0.85      | 0.7366667 |
|             | 30                             | default      | 0.44                    | 0.99      | 0.6092308 | 0           | 0         | 0         | 0           | 0         | 0         | 0.67        | 0.82      | 0.7374497 |
|             |                                | -T19         |                         |           |           | 0.57        | 0.84      | 0.6820325 | 0.56        | 0.98      | 0.7127273 | 0.70        | 0.88      | 0.7797468 |
|             | 50                             | default      | 0.45                    | 0.99      | 0.61875   | 0           | 0         | 0         | 0           | 0         | 0         | 0.67        | 0.80      | 0.7292517 |
|             |                                | -T19         |                         |           |           | 0.63        | 0.78      | 0.696325  | 0.55        | 0.99      | 0.7071429 | 0.77        | 0.80      | 0.7847134 |
|             | 70                             | default      | 0.39                    | 0.99      | 0.5595652 | 0           | 0         | 0         | 0           | 0         | 0         | 0.48        | 0.58      | 0.525283  |
|             |                                | -T19         |                         |           |           | 0.55        | 0.80      | 0.6543967 | 0.52        | 0.98      | 0.6794667 | 0.56        | 0.54      | 0.5498182 |
| 60          | 10                             | default      | 0.50                    | 0.99      | 0.6644295 | 0.15        | 0.90      | 0.2585278 | 0.13        | 0.98      | 0.2295495 | 0.73        | 0.93      | 0.8179518 |
|             |                                | -T19         |                         |           |           | 0.12        | 0.75      | 0.2051282 | 0.12        | 0.98      | 0.2138182 | 0.72        | 0.82      | 0.7667532 |
|             | 30                             | default      | 0.52                    | 0.99      | 0.6818543 | 0.12        | 0.75      | 0.2051282 | 0.12        | 0.98      | 0.2138182 | 0.72        | 0.82      | 0.7667532 |
|             |                                | -T19         |                         |           |           | 0.12        | 0.78      | 0.2113821 | 0.12        | 0.98      | 0.2138182 | 0.69        | 0.77      | 0.7278082 |
|             | 50                             | default      | 0.51                    | 0.99      | 0.6732    | 0.12        | 0.78      | 0.2113821 | 0.12        | 0.98      | 0.2138182 | 0.69        | 0.77      | 0.7278082 |
|             |                                | -T19         |                         |           |           | 0.14        | 0.60      | 0.2327837 | 0.14        | 0.98      | 0.245     | 0.69        | 0.67      | 0.6798529 |
|             | 70                             | default      | 0.47                    | 0.99      | 0.6373973 | 0.14        | 0.60      | 0.2327837 | 0.14        | 0.98      | 0.245     | 0.69        | 0.67      | 0.6798529 |
|             |                                | -T19         |                         |           |           | 0.14        | 0.60      | 0.2327837 | 0.14        | 0.98      | 0.245     | 0.69        | 0.67      | 0.6798529 |
| 80          | 10                             | default      | 0.61                    | 0.99      | 0.754875  | 0.55        | 0.90      | 0.6808607 | 0.53        | 0.98      | 0.687947  | 0.77        | 0.92      | 0.8383432 |
|             |                                | -T19         |                         |           |           | 0.63        | 0.84      | 0.7193303 | 0.57        | 0.98      | 0.7207742 | 0.75        | 0.85      | 0.796875  |
|             | 30                             | default      | 0.60                    | 0.99      | 0.7471698 | 0.63        | 0.84      | 0.7193303 | 0.57        | 0.98      | 0.7207742 | 0.75        | 0.85      | 0.796875  |
|             |                                | -T19         |                         |           |           | 0.68        | 0.88      | 0.7688675 | 0.59        | 0.98      | 0.7365605 | 0.80        | 0.85      | 0.8242424 |
|             | 50                             | default      | 0.58                    | 0.99      | 0.731465  | 0.68        | 0.88      | 0.7688675 | 0.59        | 0.98      | 0.7365605 | 0.80        | 0.85      | 0.8242424 |
|             |                                | -T19         |                         |           |           | 0.60        | 0.84      | 0.7033201 | 0.54        | 0.98      | 0.6963158 | 0.77        | 0.81      | 0.7894937 |
|             | 70                             | default      | 0.56                    | 0.99      | 0.7153548 | 0.60        | 0.84      | 0.7033201 | 0.54        | 0.98      | 0.6963158 | 0.77        | 0.81      | 0.7894937 |
|             |                                | -T19         |                         |           |           | 0.60        | 0.84      | 0.7033201 | 0.54        | 0.98      | 0.6963158 | 0.77        | 0.81      | 0.7894937 |
| 100         | 10                             | default      | 0.58                    | 0.99      | 0.731465  | 0.67        | 0.89      | 0.7660561 | 0.65        | 0.99      | 0.7847561 | 0.80        | 0.90      | 0.8470588 |
|             |                                | -T19         |                         |           |           | 0.69        | 0.85      | 0.7629375 | 0.66        | 0.99      | 0.792     | 0.78        | 0.83      | 0.8042236 |
|             | 30                             | default      | 0.35                    | 0.98      | 0.5157895 | 0.69        | 0.85      | 0.7629375 | 0.66        | 0.99      | 0.792     | 0.78        | 0.83      | 0.8042236 |
|             |                                | -T19         |                         |           |           | 0.72        | 0.84      | 0.7739515 | 0.68        | 0.99      | 0.8062275 | 0.77        | 0.85      | 0.8080247 |
|             | 50                             | default      | 0.61                    | 0.99      | 0.7529643 | 0.72        | 0.84      | 0.7739515 | 0.68        | 0.99      | 0.8062275 | 0.77        | 0.85      | 0.8080247 |
|             |                                | -T19         |                         |           |           | 0.69        | 0.83      | 0.7524394 | 0.67        | 0.98      | 0.7958788 | 0.78        | 0.82      | 0.7995    |
|             | 70                             | default      | 0.59                    | 0.99      | 0.7393671 | 0.69        | 0.83      | 0.7524394 | 0.67        | 0.98      | 0.7958788 | 0.78        | 0.82      | 0.7995    |
|             |                                | -T19         |                         |           |           | 0.69        | 0.83      | 0.7524394 | 0.67        | 0.98      | 0.7958788 | 0.78        | 0.82      | 0.7995    |
| 125         | 10                             | default      | 0.54                    | 0.99      | 0.6988235 | 0.69        | 0.95      | 0.7968127 | 0.75        | 0.98      | 0.849711  | 0.91        | 0.88      | 0.8947486 |
|             |                                | -T19         |                         |           |           | 0.75        | 0.92      | 0.8274583 | 0.69        | 0.98      | 0.8098204 | 0.79        | 0.77      | 0.7798718 |
|             | 30                             | default      | 0.60                    | 0.99      | 0.7471698 | 0.75        | 0.92      | 0.8274583 | 0.69        | 0.98      | 0.8098204 | 0.79        | 0.77      | 0.7798718 |
|             |                                | -T19         |                         |           |           | 0.70        | 0.87      | 0.7735615 | 0.68        | 0.98      | 0.8028916 | 0.80        | 0.80      | 0.8       |
|             | 50                             | default      | 0.52                    | 0.99      | 0.6818543 | 0.70        | 0.87      | 0.7735615 | 0.68        | 0.98      | 0.8028916 | 0.80        | 0.80      | 0.8       |
|             |                                | -T19         |                         |           |           | 0.72        | 0.89      | 0.7969264 | 0.71        | 0.98      | 0.823432  | 0.74        | 0.73      | 0.734966  |
|             | 70                             | default      | 0.59                    | 0.99      | 0.7393671 | 0.72        | 0.89      | 0.7969264 | 0.71        | 0.98      | 0.823432  | 0.74        | 0.73      | 0.734966  |
|             |                                | -T19         |                         |           |           | 0.72        | 0.89      | 0.7969264 | 0.71        | 0.98      | 0.823432  | 0.74        | 0.73      | 0.734966  |
| 150         | 10                             | default      | 0.46                    | 0.98      | 0.6261111 | 0.71        | 0.95      | 0.8104628 | 0.68        | 0.98      | 0.8028916 | 0.85        | 0.84      | 0.8449704 |
|             |                                | -T19         |                         |           |           | 0.70        | 0.88      | 0.781315  | 0.72        | 0.99      | 0.8336842 | 0.82        | 0.81      | 0.8149693 |
|             | 30                             | default      | 0.51                    | 0.99      | 0.6732    | 0.70        | 0.88      | 0.781315  | 0.72        | 0.99      | 0.8336842 | 0.82        | 0.81      | 0.8149693 |
|             |                                | -T19         |                         |           |           | 0.73        | 0.88      | 0.8006499 | 0.70        | 0.98      | 0.8166667 | 0.79        | 0.80      | 0.7949686 |
|             | 50                             | default      | 0.46                    | 0.99      | 0.6281379 | 0.73        | 0.88      | 0.8006499 | 0.70        | 0.98      | 0.8166667 | 0.79        | 0.80      | 0.7949686 |
|             |                                | -T19         |                         |           |           | 0.71        | 0.90      | 0.7910777 | 0.70        | 0.98      | 0.8166667 | 0.82        | 0.74      | 0.7779487 |
|             | 70                             | default      | 0.47                    | 0.99      | 0.6373973 | 0.71        | 0.90      | 0.7910777 | 0.70        | 0.98      | 0.8166667 | 0.82        | 0.74      | 0.7779487 |
|             |                                | -T19         |                         |           |           | 0.71        | 0.90      | 0.7910777 | 0.70        | 0.98      | 0.8166667 | 0.82        | 0.74      | 0.7779487 |
